# Supplementary material
Source: publisher figshare collection journal article supplement (https://tandf.figshare.com/articles/dataset/_/5923372)
Supplement: Supplementary file 1 [file 2]

11 Do you have a best friend in whom you confide?

- ☐ Yes ☐ No

12 How often do you travel outside the home?

- ☐ Almost every day ☐ Almost every week ☐ Seldom / never (less than once per week)

13 Please check the answer that best corresponds to your current (during the past month) work situation:

- ☐ Full-time (more than 20 hours per week)  
☐ Part-time (less than or equal to 20 hours per week)  
☐ Not working, but actively looking for work  
☐ Not working, not looking for work  
☐ Not applicable, retired due to age

14 Please check the answer that best corresponds to your current (during the past month) school or training program situation:

- ☐ Full-time  
☐ Part-time  
☐ Not attending school or training program  
☐ Not applicable, retired due to age

15 In the past month, how often did you engage in volunteer activities?

- ☐ 5 or more ☐ 1-4 times ☐ Never

16 How often do you write to people for social contact using the Internet (e.g., email, social networking sites such as Facebook)?

- ☐ Every day / most days ☐ Almost every week ☐ Seldom / never

17 How often do you talk to people for social contact using an online video link (e.g. Skype, FaceTime)?

- ☐ Every day / most days ☐ Almost every week ☐ Seldom / never

18 How often do you make social contact with people by talking or text messaging using your phone?

- ☐ Every day / most days ☐ Almost every week ☐ Seldom / never

Comments:
