# Supplementary material
Source: publisher figshare collection journal article supplement (https://tandf.figshare.com/articles/dataset/_/5923372)
Supplement: Supplementary file 2 [file 2]

# The Community Integration Questionnaire-Revised (CIQ-R)

Name: \_\_\_\_\_

Date: \_\_\_\_\_

1 Who usually does the shopping for groceries or other necessities in your household?

☐ Yourself alone

☐ Yourself and someone else

☐ Someone else

2 Who usually prepares meals in your household?

☐ Yourself alone

☐ Yourself and someone else

☐ Someone else

3 In your home who usually does normal everyday housework?

☐ Yourself alone

☐ Yourself and someone else

☐ Someone else

4 Who usually cares for the children in your home?

☐ Yourself alone

☐ Yourself and someone else

☐ Someone else

☐ Not applicable (no children under 17 yrs in the home)

5 Who usually plans social arrangements such as get-togethers with family and friends?

☐ Yourself alone

☐ Yourself and someone else

☐ Someone else

6 Who usually looks after your personal finances, such as banking or paying bills?

☐ Yourself alone

☐ Yourself and someone else

☐ Someone else

7 Approximately how many times a month do you usually participate in shopping outside your home?

☐ 5 or more

☐ 1-4 times

☐ Never

8 Approximately how many times a month do you usually participate in leisure activities such as movies, sports, restaurants, etc?

☐ 5 or more

☐ 1-4 times

☐ Never

9 Approximately how many times a month do you usually visit friends or relatives?

☐ 5 or more

☐ 1-4 times

☐ Never

10 When you participate in leisure activities do you usually do this alone or with others?

☐ Mostly alone

☐ Mostly with family members

☐ Mostly with friends who have a disability

☐ Mostly with friends who do not have a disability

☐ With a combination of family and friends
